# Supplementary material
Source: PubMed Central journal article supplement (PMC3859436)
Supplement: NIHMS531002-supplement-1_si_001.pdf [file NIHMS531002-supplement-1_si_001.pdf]

# Supporting Information

## Effect of Sodium Ions on RNA Duplex Stability

*Zexiang Chen and Brent M. Znosko\**

Department of Chemistry, Saint Louis University; 3501 Laclede Ave., Saint Louis, MO

63103

Figure S1:  $\Delta H^\circ$  vs  $\ln [\text{Na}^+]$  for representative RNA oligomers of different G-C base pair contents: 100% GC, 5'-(CGCGCG)<sub>2</sub>-3'; 66.7% GC, 5'-(GCAUGC)<sub>2</sub>-3'; and 25% GC, 5'-(AGAUAUCU)<sub>2</sub>-3'. 1.021 M data for these representative RNA oligomers are from Xia et al. (9).

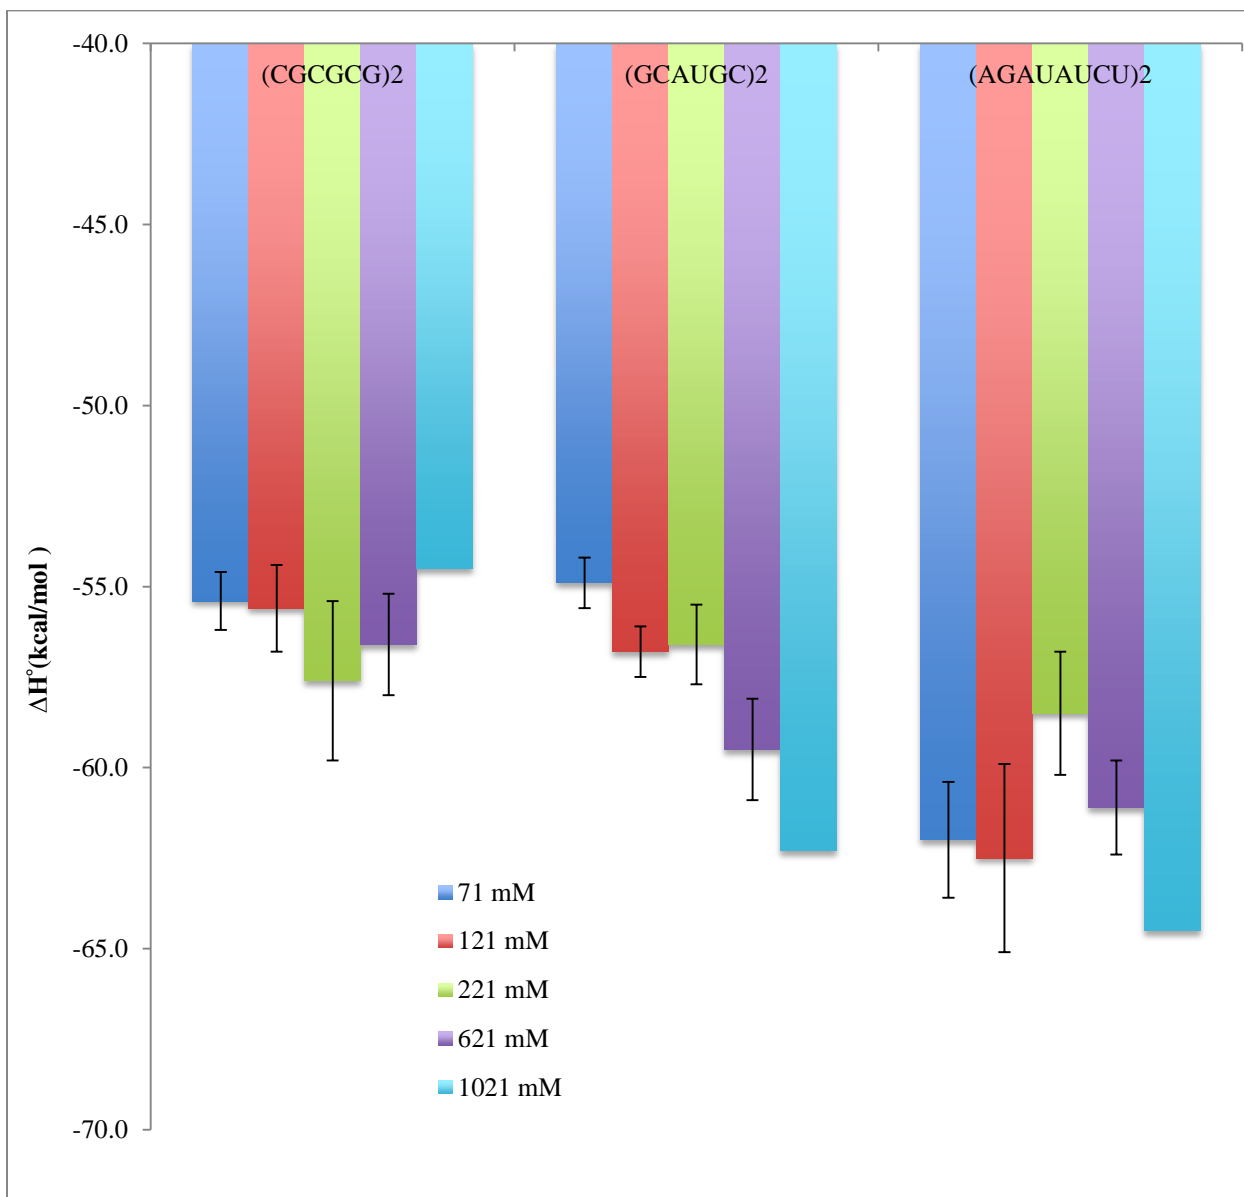

Figure S2:  $\Delta S^\circ$  vs  $\ln [\text{Na}^+]$  for representative RNA oligomers of different G-C base pair contents: 100% GC, 5'-(CGCGCG)<sub>2</sub>-3'; 66.7% GC, 5'-(GCAUGC)<sub>2</sub>-3'; and 25% GC, 5'-(AGAUAUCU)<sub>2</sub>-3'. 1.021 M data for these representative RNA oligomers are from Xia et al. (9).

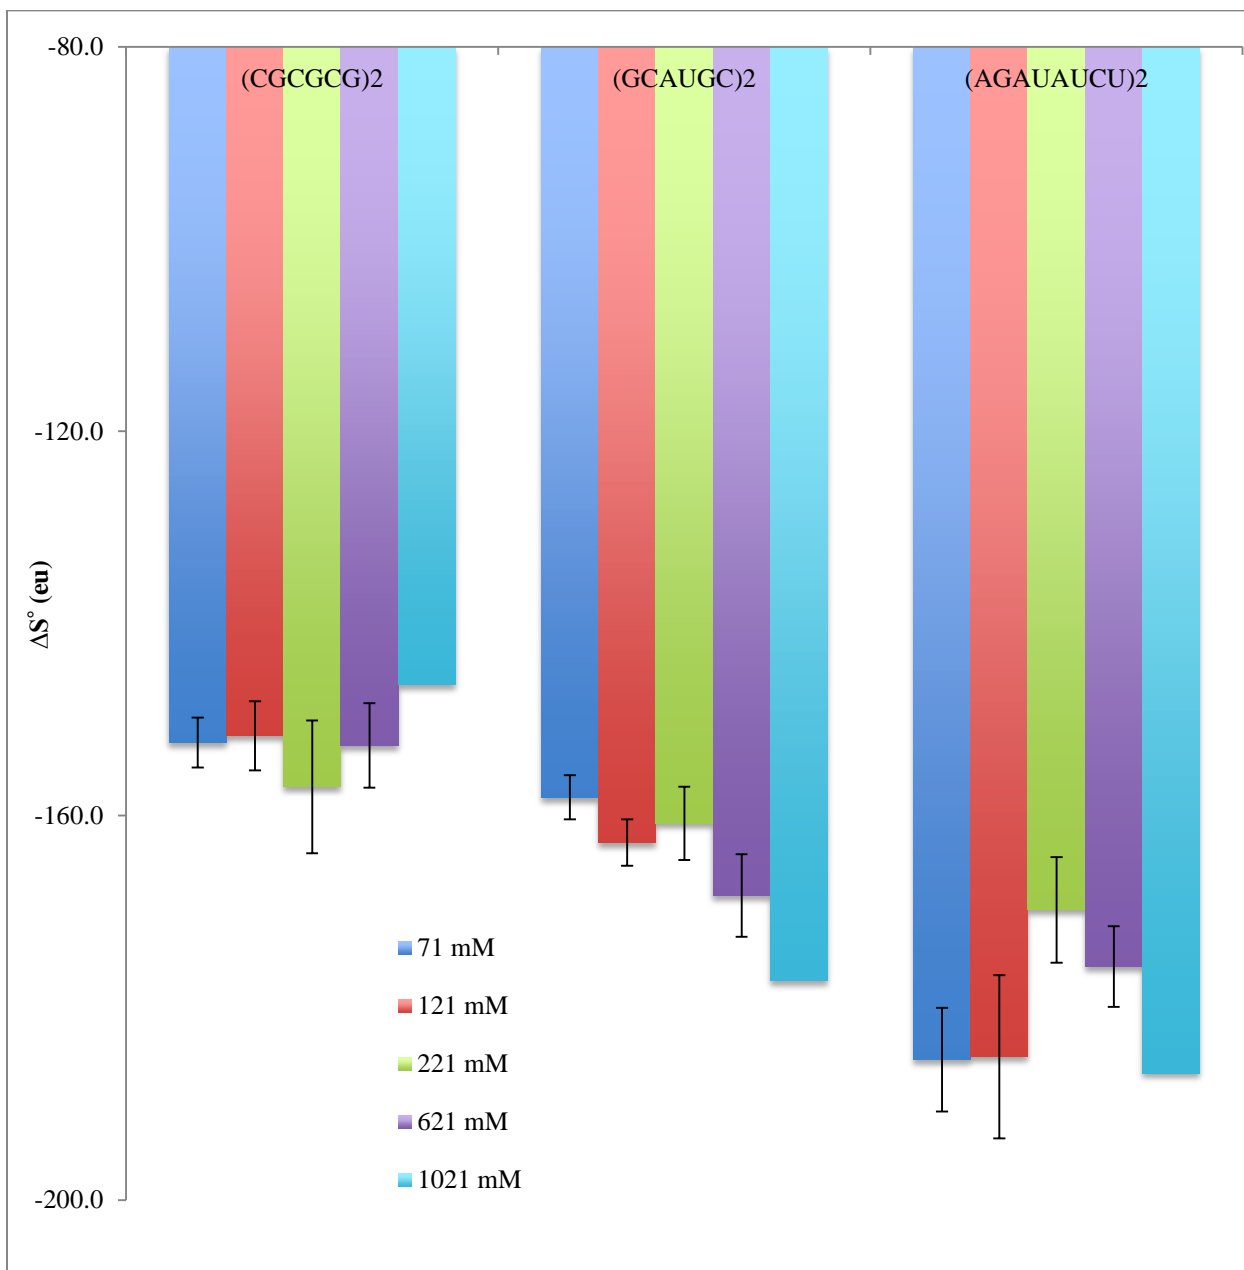

Table S1: Experimental RNA Thermodynamic Parameters for Duplex Formation

| Sequence <sup>a</sup> | [Na <sup>+</sup> ]   | Analysis of Curve Fits |             |                             |                                  | Analysis of T <sub>m</sub> <sup>-1</sup> vs. ln C <sub>t</sub> Plot |             |                             |                                  |
|-----------------------|----------------------|------------------------|-------------|-----------------------------|----------------------------------|---------------------------------------------------------------------|-------------|-----------------------------|----------------------------------|
|                       |                      | ΔH° (kcal/mol)         | ΔS° (eu)    | ΔG <sub>37</sub> (kcal/mol) | T <sub>m</sub> <sup>c</sup> (°C) | ΔH° (kcal/mol)                                                      | ΔS° (eu)    | ΔG <sub>37</sub> (kcal/mol) | T <sub>m</sub> <sup>c</sup> (°C) |
| CGCGCG                | 71 mM                | -53.3±2.1              | -145.7±6.5  | -8.07±0.07                  | 51.6                             | -55.4±0.8                                                           | -152.4±2.6  | -8.12±0.03                  | 51.3                             |
|                       | 121 mM               | -54.0±2.2              | -147.0±6.9  | -8.47±0.10                  | 53.9                             | -55.6±1.2                                                           | -151.7±3.6  | -8.52±0.05                  | 53.7                             |
|                       | 221 mM               | -56.2±1.5              | -152.8±4.7  | -8.81±0.09                  | 55.3                             | -57.6±2.2                                                           | -157.0±6.9  | -8.87±0.11                  | 55.2                             |
|                       | 621 mM               | -56.0±3.2              | -150.7±9.6  | -9.22±0.21                  | 58.0                             | -56.6±1.4                                                           | -152.7±4.4  | -9.23±0.08                  | 57.8                             |
|                       | 1.021 M <sup>b</sup> | -53.8                  | -144.2      | -9.08                       | 57.9                             | -54.5                                                               | -146.4      | -9.12                       | 57.8                             |
| CGGCCG                | 71 mM                | -54.0±2.2              | -146.2±6.8  | -8.71±0.11                  | 55.4                             | -55.7±0.9                                                           | -151.2±2.9  | -8.76±0.05                  | 55.2                             |
|                       | 121 mM               | -53.7±2.1              | -144.2±6.4  | -9.02±0.10                  | 57.6                             | -55.2±1.2                                                           | -148.8±3.8  | -9.09±0.07                  | 57.4                             |
|                       | 221 mM               | -53.5±1.7              | -142.4±5.0  | -9.38±0.10                  | 60.1                             | -54.2±1.1                                                           | -144.4±3.3  | -9.40±0.06                  | 59.9                             |
|                       | 621 mM               | -54.2±2.3              | -143.4±7.0  | -9.73±0.17                  | 62.1                             | -54.2±1.7                                                           | -143.3±5.0  | -9.70±0.11                  | 61.9                             |
|                       | 1.021 M <sup>b</sup> | -56.6                  | -150.0      | -10.11                      | 63.3                             | -54.1                                                               | -142.6      | -9.90                       | 63.2                             |
| GCCGGC                | 71 mM                | -63.6±3.1              | -172.5±9.3  | -10.13±0.19                 | 60.3                             | -65.6±1.8                                                           | -178.5±5.4  | -10.23±0.12                 | 60.1                             |
|                       | 121 mM               | -64.5±2.8              | -173.8±8.4  | -10.63±0.20                 | 62.8                             | -66.3±1.1                                                           | -179.1±3.4  | -10.73±0.09                 | 62.6                             |
|                       | 221 mM               | -62.7±1.5              | -166.9±4.2  | -10.88±0.16                 | 65.1                             | -63.0±3.4                                                           | -168.1±10.2 | -10.90±0.25                 | 65.0                             |
|                       | 621 mM               | -64.4±1.4              | -170.6±4.2  | -11.46±0.15                 | 67.6                             | -63.9±3.1                                                           | -169.2±9.2  | -11.41±0.24                 | 67.6                             |
|                       | 1.021 M              | -65.7±3.1              | -174.6±9.3  | -11.59±0.25                 | 67.6                             | -67.3±2.5                                                           | -179.3±7.5  | -11.69±0.21                 | 67.4                             |
| GCGCGC                | 71 mM                | -56.7±1.9              | -154.2±5.9  | -8.85±0.09                  | 55.4                             | -57.2±1.3                                                           | -155.7±4.0  | -8.85±0.06                  | 55.3                             |
|                       | 121 mM               | -57.6±1.6              | -155.8±5.0  | -9.32±0.11                  | 58.0                             | -58.0±1.5                                                           | -156.8±4.6  | -9.32±0.09                  | 57.8                             |
|                       | 221 mM               | -60.3±2.4              | -162.6±7.4  | -9.83±0.15                  | 60.0                             | -60.5±1.6                                                           | -163.2±4.9  | -9.83±0.11                  | 59.9                             |
|                       | 621 mM               | -60.8±1.9              | -162.9±5.7  | -10.27±0.12                 | 62.4                             | -61.3±2.6                                                           | -164.4±7.7  | -10.29±0.18                 | 62.3                             |
|                       | 1.021 M              | -61.2±3.6              | -164.0±10.9 | -10.38±0.22                 | 62.8                             | -64.3±1.6                                                           | -173.4±4.7  | -10.56±0.11                 | 62.5                             |

| Sequence <sup>a</sup> | Analysis of Curve Fits |                |             |                              |                                  | Analysis of T <sub>m</sub> <sup>-1</sup> vs. ln C <sub>1</sub> Plot |             |                              |                                  |
|-----------------------|------------------------|----------------|-------------|------------------------------|----------------------------------|---------------------------------------------------------------------|-------------|------------------------------|----------------------------------|
|                       | [Na <sup>+</sup> ]     | ΔH° (kcal/mol) | ΔS° (eu)    | ΔG° <sub>37</sub> (kcal/mol) | T <sub>m</sub> <sup>c</sup> (°C) | ΔH° (kcal/mol)                                                      | ΔS° (eu)    | ΔG° <sub>37</sub> (kcal/mol) | T <sub>m</sub> <sup>c</sup> (°C) |
| ACCGGU                | 71 mM                  | -48.0±5.1      | -132.6±16.7 | -6.82±0.15                   | 44.6                             | -55.9±6.0                                                           | -158.0±19.3 | -6.85±0.20                   | 43.7                             |
|                       | 121 mM                 | -48.5±4.1      | -133.1±13.5 | -7.23±0.09                   | 47.3                             | -49.7±4.9                                                           | -136.7±15.4 | -7.25±0.19                   | 47.2                             |
|                       | 221 mM                 | -48.8±3.0      | -132.5±9.4  | -7.66±0.22                   | 50.1                             | -49.1±4.8                                                           | -133.6±15.0 | -7.67±0.21                   | 50.1                             |
|                       | 621 mM                 | -51.9±4.4      | -141.2±13.5 | -8.12±0.35                   | 52.3                             | -51.8±7.8                                                           | -141.0±24.2 | -8.07±0.52                   | 52.0                             |
|                       | 1.021 M <sup>b</sup>   | -53.2          | -144.9      | -8.26                        | 52.8                             | -59.8                                                               | -164.5      | -8.51                        | 53.9                             |
| AGCGCU                | 71 mM                  | -47.3±5.4      | -132.1±17.8 | -6.33±0.19                   | 41.3                             | -47.2±4.0                                                           | -131.7±12.9 | -6.32±0.17                   | 41.3                             |
|                       | 121 mM                 | -45.6±2.3      | -124.6±7.8  | -6.92±0.12                   | 45.7                             | -45.0±4.0                                                           | -122.8±12.6 | -6.91±0.14                   | 45.7                             |
|                       | 221 mM                 | -46.9±4.7      | -127.5±15.3 | -7.33±0.14                   | 48.4                             | -50.0±6.3                                                           | -137.5±19.9 | -7.38±0.31                   | 47.9                             |
|                       | 621 mM                 | -47.7±5.1      | -128.7±16.8 | -7.81±0.21                   | 51.5                             | -48.5±8.9                                                           | -131.1±27.5 | -7.82±0.63                   | 51.4                             |
|                       | 1.021 M <sup>b</sup>   | -50.9          | -137.9      | -8.13                        | 52.7                             | -50.1                                                               | -135.7      | -7.99                        | 52.0                             |
| CACGUG                | 71 mM                  | -54.8±5.4      | -160.2±17.4 | -5.13±0.08                   | 33.9                             | -53.2±1.1                                                           | -154.9±3.7  | -5.10±0.02                   | 33.6                             |
|                       | 121 mM                 | -54.1±5.7      | -156.5±18.7 | -5.58±0.11                   | 36.5                             | -54.1±1.6                                                           | -156.5±5.2  | -5.54±0.03                   | 36.2                             |
|                       | 221 mM                 | -53.0±5.6      | -151.7±18.2 | -5.99±0.06                   | 38.8                             | -53.5±2.1                                                           | -153.4±6.7  | -5.94±0.03                   | 38.5                             |
|                       | 621 mM                 | -55.1±8.0      | -156.5±26.0 | -6.52±0.11                   | 41.8                             | -60.4±3.4                                                           | -173.9±10.9 | -6.45±0.06                   | 41.0                             |
|                       | 1.021 M <sup>b</sup>   | -55.3          | -156.8      | -6.68                        | 42.8                             | -50.3                                                               | -141.0      | -6.59                        | 42.8                             |
| CAGCUG                | 71 mM                  | -52.4±3.5      | -151.5±11.3 | -5.42±0.06                   | 35.5                             | -53.3±1.0                                                           | -154.5±3.4  | -5.37±0.01                   | 35.3                             |
|                       | 121 mM                 | -51.3±4.3      | -146.9±14.0 | -5.78±0.06                   | 37.6                             | -52.4±1.8                                                           | -150.5±5.7  | -5.72±0.02                   | 37.2                             |
|                       | 221 mM                 | -52.4±4.9      | -148.8±15.9 | -6.21±0.10                   | 40.2                             | -57.5±2.6                                                           | -165.6±8.3  | -6.18±0.03                   | 39.7                             |
|                       | 621 mM                 | -51.0±6.9      | -143.1±22.2 | -6.61±0.04                   | 42.8                             | -57.0±2.2                                                           | -162.4±6.9  | -6.60±0.03                   | 42.1                             |
|                       | 1.021 M <sup>b</sup>   | -50.2          | -140.0      | -6.78                        | 44.0                             | -51.6                                                               | -144.7      | -6.68                        | 43.1                             |

| Sequence <sup>a</sup> | Analysis of Curve Fits |                |             |                              |                                  | Analysis of T <sub>m</sub> <sup>-1</sup> vs. ln C <sub>1</sub> Plot |             |                              |                                  |
|-----------------------|------------------------|----------------|-------------|------------------------------|----------------------------------|---------------------------------------------------------------------|-------------|------------------------------|----------------------------------|
|                       | [Na <sup>+</sup> ]     | ΔH° (kcal/mol) | ΔS° (eu)    | ΔG° <sub>37</sub> (kcal/mol) | T <sub>m</sub> <sup>c</sup> (°C) | ΔH° (kcal/mol)                                                      | ΔS° (eu)    | ΔG° <sub>37</sub> (kcal/mol) | T <sub>m</sub> <sup>c</sup> (°C) |
| CCAUGG                | 71 mM                  | -57.1±3.6      | -166.5±11.6 | -5.48±0.07                   | 36.0                             | -57.9±2.5                                                           | -169.0±8.0  | -5.44±0.04                   | 35.7                             |
|                       | 121 mM                 | -58.6±5.7      | -170.4±18.6 | -5.72±0.11                   | 37.2                             | -56.7±2.3                                                           | -164.5±7.6  | -5.68±0.03                   | 37.0                             |
|                       | 221 mM                 | -56.6±6.8      | -161.7±22.0 | -6.40±0.06                   | 41.0                             | -61.3±1.5                                                           | -177.1±4.9  | -6.34±0.01                   | 40.4                             |
|                       | 621 mM                 | -58.3±9.0      | -165.3±29.0 | -7.03±0.10                   | 44.3                             | -65.9±4.4                                                           | -189.9±13.9 | -7.02±0.09                   | 43.5                             |
|                       | 1.021 M <sup>b</sup>   | -61.0          | -172.5      | -7.49                        | 46.6                             | -56.9                                                               | -159.9      | -7.30                        | 46.4                             |
| CCUAGG                | 71 mM                  | -58.8±1.6      | -169.6±5.2  | -6.22±0.07                   | 39.9                             | -62.6±1.4                                                           | -181.9±4.4  | -6.22±0.01                   | 39.7                             |
|                       | 121 mM                 | -61.0±5.3      | -174.9±17.0 | -6.79±0.14                   | 42.8                             | -63.7±2.6                                                           | -183.4±8.3  | -6.76±0.03                   | 42.4                             |
|                       | 221 mM                 | -60.5±3.3      | -171.8±10.5 | -7.19±0.03                   | 45.0                             | -62.3±1.1                                                           | -177.7±3.4  | -7.18±0.02                   | 44.7                             |
|                       | 621 mM                 | -60.7±5.7      | -170.9±18.2 | -7.70±0.15                   | 47.7                             | -62.0±4.8                                                           | -175.1±15.2 | -7.68±0.15                   | 47.4                             |
|                       | 1.021 M <sup>b</sup>   | -59.7          | -166.5      | -8.06                        | 49.9                             | -54.1                                                               | -149.1      | -7.80                        | 50.0                             |
| CUGCAG                | 71 mM                  | -55.4±1.7      | -160.3±5.6  | -5.70±0.07                   | 37.1                             | -57.2±1.7                                                           | -165.9±5.6  | -5.69±0.02                   | 37.1                             |
|                       | 121 mM                 | -55.1±2.7      | -157.5±8.8  | -6.23±0.03                   | 40.1                             | -56.4±0.6                                                           | -161.8±2.1  | -6.20±0.00                   | 39.9                             |
|                       | 221 mM                 | -54.1±1.9      | -153.2±6.3  | -6.54±0.03                   | 42.1                             | -55.6±0.8                                                           | -158.1±2.5  | -6.53±0.01                   | 41.9                             |
|                       | 621 mM                 | -55.6±3.0      | -156.5±9.4  | -7.07±0.15                   | 44.9                             | -55.5±1.7                                                           | -156.3±5.4  | -7.03±0.03                   | 44.8                             |
|                       | 1.021 M <sup>b</sup>   | -54.5          | -153        | -7.05                        | 45.0                             | -55.4                                                               | -155.7      | -7.11                        | 45.3                             |
| GACGUC                | 71 mM                  | -57.1±4.9      | -165.0±15.9 | -5.95±0.08                   | 38.5                             | -57.5±0.9                                                           | -166.1±3.0  | -5.96±0.01                   | 38.5                             |
|                       | 121 mM                 | -56.8±3.4      | -162.2±10.8 | -6.47±0.04                   | 41.4                             | -57.4±1.0                                                           | -164.3±3.4  | -6.44±0.01                   | 41.2                             |
|                       | 221 mM                 | -55.7±2.2      | -157.6±7.1  | -6.78±0.06                   | 43.3                             | -56.5±1.4                                                           | -160.2±4.5  | -6.77±0.02                   | 43.1                             |
|                       | 621 mM                 | -54.9±2.6      | -153.6±8.1  | -7.26±0.08                   | 46.2                             | -56.3±1.9                                                           | -158.2±6.1  | -7.26±0.04                   | 46.0                             |
|                       | 1.021 M <sup>b</sup>   | -57.3          | -161.0      | -7.37                        | 46.4                             | -58.1                                                               | -163.5      | -7.35                        | 46.2                             |

| Sequence <sup>a</sup> | Analysis of Curve Fits |                |             |                              |                                  | Analysis of T <sub>m</sub> <sup>-1</sup> vs. ln C <sub>1</sub> Plot |            |                              |                                  |
|-----------------------|------------------------|----------------|-------------|------------------------------|----------------------------------|---------------------------------------------------------------------|------------|------------------------------|----------------------------------|
|                       | [Na <sup>+</sup> ]     | ΔH° (kcal/mol) | ΔS° (eu)    | ΔG° <sub>37</sub> (kcal/mol) | T <sub>m</sub> <sup>c</sup> (°C) | ΔH° (kcal/mol)                                                      | ΔS° (eu)   | ΔG° <sub>37</sub> (kcal/mol) | T <sub>m</sub> <sup>c</sup> (°C) |
| GAGCUC                | 71 mM                  | -54.7±1.8      | -156.0±5.9  | -6.26±0.04                   | 40.3                             | -54.5±0.7                                                           | -155.6±2.4 | -6.24±0.01                   | 40.2                             |
|                       | 121 mM                 | -55.7±2.7      | -157.8±8.6  | -6.72±0.09                   | 42.9                             | -56.4±1.3                                                           | -160.2±4.0 | -6.70±0.02                   | 42.7                             |
|                       | 221 mM                 | -55.6±2.4      | -156.2±7.7  | -7.11±0.06                   | 45.2                             | -57.8±1.2                                                           | -163.2±3.8 | -7.13±0.03                   | 45.0                             |
|                       | 621 mM                 | -56.5±2.6      | -157.5±8.3  | -7.60±0.07                   | 47.9                             | -57.3±0.7                                                           | -160.3±2.3 | -7.59±0.02                   | 47.7                             |
|                       | 1.021 M <sup>b</sup>   | -58.3          | -163.0      | -7.75                        | 48.4                             | -62.3                                                               | -175.3     | -7.98                        | 48.7                             |
| GCAUGC                | 71 mM                  | -55.2±2.5      | -159.1±8.0  | -5.84±0.03                   | 37.9                             | -54.9±0.7                                                           | -158.1±2.3 | -5.81±0.00                   | 37.8                             |
|                       | 121 mM                 | -56.7±2.6      | -162.3±8.5  | -6.30±0.03                   | 40.4                             | -56.8±0.7                                                           | -162.8±2.4 | -6.26±0.01                   | 40.2                             |
|                       | 221 mM                 | -55.4±3.6      | -157.1±11.4 | -6.71±0.05                   | 42.9                             | -56.6±1.1                                                           | -160.8±3.8 | -6.69±0.02                   | 42.6                             |
|                       | 621 mM                 | -58.5±3.8      | -165.1±12.1 | -7.34±0.09                   | 46.1                             | -59.5±1.4                                                           | -168.3±4.3 | -7.31±0.03                   | 45.8                             |
|                       | 1.021 M <sup>b</sup>   | -59.6          | -168.4      | -7.41                        | 46.3                             | -62.3                                                               | -177.2     | -7.38                        | 45.7                             |
| AACUAGUU              | 71 mM                  | -58.9±1.9      | -173.5±6.1  | -5.11±0.03                   | 34.0                             | -59.0±1.2                                                           | -173.8±4.0 | -5.09±0.03                   | 34.0                             |
|                       | 121 mM                 | -59.8±3.4      | -174.5±11.1 | -5.68±0.02                   | 37.0                             | -58.4±1.5                                                           | -169.8±4.8 | -5.68±0.02                   | 37.0                             |
|                       | 221 mM                 | -60.1±3.6      | -173.5±11.6 | -6.27±0.03                   | 40.1                             | -59.6±0.7                                                           | -171.9±2.3 | -6.24±0.00                   | 40.0                             |
|                       | 621 mM                 | -59.6±1.9      | -169.8±6.0  | -6.95±0.06                   | 43.8                             | -58.2±1.6                                                           | -165.3±5.0 | -6.92±0.02                   | 43.8                             |
|                       | 1.021 M <sup>b</sup>   | -55.2          | -155.0      | -7.13                        | 45.4                             | -54.6                                                               | -153.0     | -7.16                        | 45.7                             |
| ACUAUAGU              | 71 mM                  | -61.3±2.9      | -182.0±9.4  | -4.89±0.06                   | 33.1                             | -61.3±1.6                                                           | -181.9±5.2 | -4.86±0.04                   | 32.9                             |
|                       | 121 mM                 | -63.1±4.5      | -185.6±14.5 | -5.53±0.05                   | 36.3                             | -59.4±0.6                                                           | -173.7±2.1 | -5.53±0.01                   | 36.2                             |
|                       | 221 mM                 | -63.7±3.4      | -185.8±11.1 | -6.07±0.03                   | 38.9                             | -63.8±1.0                                                           | -186.1±3.2 | -6.04±0.01                   | 38.8                             |
|                       | 621 mM                 | -64.4±3.5      | -185.4±11.3 | -6.89±0.03                   | 43.0                             | -65.5±1.3                                                           | -189.1±4.3 | -6.87±0.01                   | 42.7                             |
|                       | 1.021 M <sup>b</sup>   | -61.4          | -175.0      | -7.12                        | 44.5                             | -59.2                                                               | -168.4     | -6.98                        | 44.0                             |

| Analysis of Curve Fits |                      |                             |                       |                                  | Analysis of $T_m^{-1}$ vs. $\ln C_1$ Plot |                             |                       |                                  |              |
|------------------------|----------------------|-----------------------------|-----------------------|----------------------------------|-------------------------------------------|-----------------------------|-----------------------|----------------------------------|--------------|
| Sequence <sup>a</sup>  | [Na <sup>+</sup> ]   | $\Delta H^\circ$ (kcal/mol) | $\Delta S^\circ$ (eu) | $\Delta G_{37}^\circ$ (kcal/mol) | $T_m^c$ (°C)                              | $\Delta H^\circ$ (kcal/mol) | $\Delta S^\circ$ (eu) | $\Delta G_{37}^\circ$ (kcal/mol) | $T_m^c$ (°C) |
| ACUUAAGU               | 71 mM                | -57.3±3.2                   | -171.0±10.5           | -4.32±0.09                       | 29.8                                      | -55.1±1.3                   | -163.6±4.4            | -4.37±0.05                       | 29.8         |
|                        | 121 mM               | -60.7±1.9                   | -180.3±6.1            | -4.79±0.07                       | 32.5                                      | -61.2±1.8                   | -181.9±6.1            | -4.76±0.05                       | 32.4         |
|                        | 221 mM               | -61.3±2.8                   | -180.0±9.2            | -5.44±0.03                       | 35.8                                      | -58.8±1.1                   | -172.1±3.8            | -5.46±0.02                       | 35.8         |
|                        | 621 mM               | -61.1±2.2                   | -177.1±7.2            | -6.12±0.03                       | 39.3                                      | -60.5±0.6                   | -175.3±2.0            | -6.11±0.01                       | 39.3         |
|                        | 1.021 M <sup>b</sup> | -49.4                       | -139.0                | -6.29                            | 40.9                                      | -47.2                       | -132.4                | -6.16                            | 40.3         |
| AGAUAUCU               | 71 mM                | -64.3±3.2                   | -193.0±10.6           | -4.40±0.06                       | 30.9                                      | -62.0±1.6                   | -185.4±5.4            | -4.45±0.05                       | 31.0         |
|                        | 121 mM               | -61.9±4.8                   | -183.2±15.8           | -5.09±0.09                       | 34.1                                      | -62.5±2.6                   | -185.1±8.5            | -5.05±0.06                       | 33.9         |
|                        | 221 mM               | -61.0±3.0                   | -177.9±9.7            | -5.82±0.06                       | 37.7                                      | -58.5±1.7                   | -169.8±5.5            | -5.82±0.02                       | 37.7         |
|                        | 621 mM               | -61.0±2.1                   | -175.5±6.7            | -6.61±0.04                       | 41.8                                      | -61.1±1.3                   | -175.7±4.2            | -6.59±0.01                       | 41.7         |
|                        | 1.021 M <sup>b</sup> | -63.4                       | -183.0                | -6.64                            | 41.8                                      | -64.5                       | -186.8                | -6.58                            | 41.4         |

<sup>a</sup> Sequences are written 5' to 3'. Due to the nature of the sequences, all samples formed self-complementary duplexes in solution.

<sup>b</sup> All 1.021 M data, except for GCCGGC and GCGCGC, are from Xia et al. <sup>(9)</sup>.

<sup>c</sup> Calculated at 0.1 mM oligomer concentration.
